# Supplementary material for: Theoretical insight into the electrocatalytic reduction of CO2 with different metal ratios and reaction mechanisms on palladium–copper alloys
Source: Royal Society of Chemistry journal article supplement (doi:10.1039/c8dt03571g), 2018-12-22
Supplement: c8dt03571g1.pdf [file c8dt03571g1.pdf]

## Support information

### Theoretical Insight in Electrocatalytic CO<sub>2</sub> Reduction on Palladium-Copper Alloys: Metal ratio and Reaction Mechanism

Minmin Xing Ling Guo\* Zijun Hao

a. Key Laboratory of Magnetic Molecules & Magnetic Information Materials Ministry of Education, Shanxi Normal University. Linfen, China, 041004.

b. The School of Chemical and Material Science, Shanxi Normal University, No. 1, Gongyuan Street, Linfen, China, 041004.

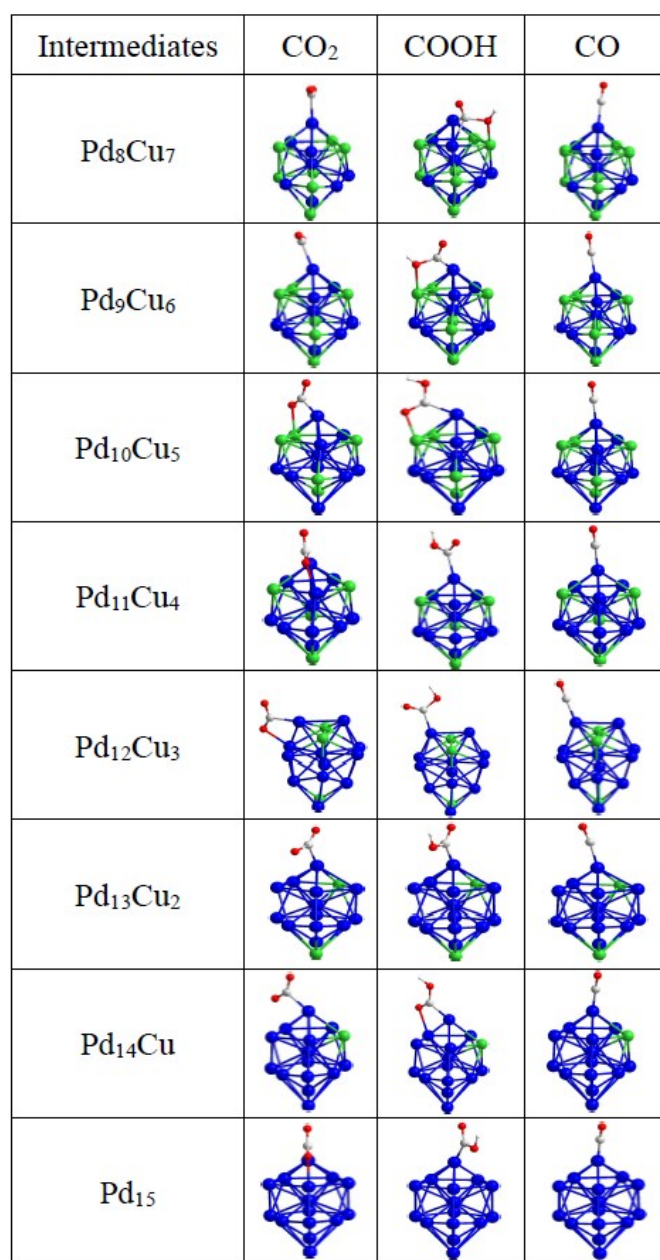

Figure S1. The structure of an intermediate different from the CO<sub>2</sub>RR to CO. Pd atoms are in blue, Cu atoms in green, O atoms in red, H atoms in white, and C atoms in gray.

Computational Method and Details of Adsorptions Energies ( $E_{ads}$ )

$$E_{ads} = E_{total} - E_{substrate} - E_{adsorbate} \quad (6)$$

$E_{total}$  is the total energy of the adsorbate–substrate system in the equilibrium state.  $E_{adsorbate}$  and  $E_{substrate}$  are the total energy of the free adsorbate and substrate in the gas phase, including cluster, hydrocarbon respectively. The  $E_{adsorbate}$  of the reaction intermediates is sum of electronic and thermal energies through the frequency calculation as a separate small molecule for the reaction intermediates ( $C_xH_yO_z$ ).

$$E_{ads} = E_{C_xH_yO_z - Pd_{10}Cu_5} - E_{Pd_{10}Cu_5} - E_{C_xH_yO_z} \quad (6-1)$$

For example, the adsorption energy of CH<sub>4</sub> adsorbed on Pd<sub>10</sub>Cu<sub>5</sub> can be expressed as:

$$E_{ads} = E_{CH_4 - Pd_{10}Cu_5} - E_{Pd_{10}Cu_5} - E_{CH_4} \quad (6-2)$$

And the adsorption energy of CHOH adsorbed on Pd<sub>10</sub>Cu<sub>5</sub> can be expressed as:

$$E_{ads} = E_{CHOH - Pd_{10}Cu_5} - E_{Pd_{10}Cu_5} - E_{CHOH} \quad (6-3)$$

Table S1. Table S1. Adsorption energies of Reactants, Intermediates, and Products on the Pd<sub>10</sub>Cu<sub>5</sub> surfaces. The unit of  $E_{total}$ ,  $E_{substrate}$  and  $E_{adsorbate}$  is Å, the unit of adsorption energies is eV.

|                                    | $E_{total}$<br>(Å) | $E_{substrate}$<br>(Å) | $E_{adsorbate}$<br>(Å) | $E_{ads}$<br>(eV) |                                    | $E_{total}$<br>(Å) | $E_{substrate}$<br>(Å) | $E_{adsorbate}$<br><sub>e</sub><br>(Å) | $E_{ads}$<br>(eV) |
|------------------------------------|--------------------|------------------------|------------------------|-------------------|------------------------------------|--------------------|------------------------|----------------------------------------|-------------------|
| CO <sub>2</sub>                    | -2436.99           | -2248.59               | -188.38                | -0.60             | CH <sub>2</sub> CHO                | -2401.59           | -2248.59               | -152.94                                | -1.84             |
| COOH                               | -2437.56           | -2248.59               | -188.87                | -2.69             | HCCH <sub>2</sub> O                | -2401.56           | -2248.59               | -152.87                                | -2.65             |
| CO                                 | -2361.83           | -2248.59               | -113.18                | -1.85             | CH <sub>2</sub> CHOH               | -2402.19           | -2248.59               | -153.55                                | -1.32             |
| C                                  | -2286.53           | -2248.59               | -37.71                 | -6.48             | CH <sub>2</sub> CH <sub>2</sub> O  | -2402.17           | -2248.59               | -153.58                                | 0.08              |
| CH                                 | -2287.19           | -2248.59               | -38.40                 | -5.52             | CHCH <sub>2</sub> OH               | -2402.15           | -2248.59               | -153.42                                | -3.77             |
| CH <sub>2</sub>                    | -2287.77           | -2248.59               | -39.04                 | -3.83             | HCCHOH                             | -2401.55           | -2248.59               | -152.88                                | -2.26             |
| CH <sub>2</sub> O                  | -2362.96           | -2248.59               | -114.34                | -0.82             | CH <sub>3</sub> CHOH               | -2402.76           | -2248.59               | -154.11                                | -1.61             |
| CH <sub>2</sub> OH                 | -2363.54           | -2248.59               | -114.87                | -2.07             | CH <sub>2</sub> CH <sub>2</sub> OH | -2402.75           | -2248.59               | -154.09                                | -2.03             |
| CH <sub>3</sub>                    | -2288.41           | -2248.59               | -39.74                 | -2.33             | CH <sub>2</sub> OCHO               | -2476.72           | -2248.59               | -228.06                                | -1.97             |
| CH <sub>3</sub> O                  | -2363.43           | -2248.59               | -114.87                | 0.65              | CH <sub>2</sub> OCO                | -2476.15           | -2248.59               | -227.51                                | -1.22             |
| CH <sub>3</sub> OH                 | -2364.13           | -2248.59               | -115.52                | -0.61             | CH <sub>2</sub> OHCHO              | -2477.33           | -2248.59               | -228.70                                | -1.19             |
| CH <sub>4</sub>                    | -2288.99           | -2248.59               | -40.40                 | -0.18             | CH <sub>2</sub> OHCO               | -2476.75           | -2248.59               | -228.07                                | -2.63             |
| CHO                                | -2362.39           | -2248.59               | -113.71                | -2.60             | CHOCHO                             | -2476.17           | -2248.59               | -227.52                                | -1.66             |
| CHOH                               | -2362.93           | -2248.59               | -114.25                | -2.69             | CHOCO                              | -2475.60           | -2248.59               | -226.91                                | -2.78             |
| COH                                | -2362.34           | -2248.59               | -113.63                | -3.12             | CHOHCHO                            | -2476.71           | -2248.59               | -228.09                                | -0.96             |
| CCO                                | -2399.84           | -2248.59               | -151.04                | -5.89             | CHOHCO                             | -2476.15           | -2248.59               | -227.50                                | -1.69             |
| CH <sub>2</sub> CO                 | -2401.02           | -2248.59               | -152.39                | -1.27             | CH <sub>2</sub> COH                | -2401.56           | -2248.59               | -152.89                                | -2.21             |
| CH <sub>3</sub> CH <sub>2</sub> O  | -2402.75           | -2248.59               | -154.10                | -1.48             | CCH <sub>2</sub> O                 | -2400.97           | -2248.59               | -152.16                                | -6.01             |
| CH <sub>3</sub> CH <sub>2</sub> OH | -2403.36           | -2248.59               | -154.75                | -0.67             | HCCOH                              | -2401.00           | -2248.59               | -152.32                                | -2.57             |
| CH <sub>3</sub> CHO                | -2402.19           | -2248.59               | -153.58                | -0.70             | CCHOH                              | -2400.99           | -2248.59               | -152.19                                | -5.92             |
| CH <sub>3</sub> CO                 | -2401.62           | -2248.59               | -152.95                | -2.32             | CCHO                               | -2400.41           | -2248.59               | -151.65                                | -4.69             |
| COCO                               | -2474.98           | -2248.59               | -226.28                | -2.98             | CH <sub>3</sub> COH                | -2402.18           | -2248.59               | -153.49                                | -2.87             |
| COCOH                              | -2475.54           | -2248.59               | -226.87                | -2.19             | CCOH                               | -2400.35           | -2248.59               | -151.63                                | -3.62             |
| HCCO                               | -2400.43           | -2248.59               | -151.73                | -3.07             | CH <sub>2</sub> COH                | -2401.55           | -2248.59               | -152.89                                | -1.97             |
| HCCHO                              | -2401.03           | -2248.59               | -152.25                | -5.24             |                                    |                    |                        |                                        |                   |

Table S2. Comparison of calculated adsorption energies (in eV) for  $C_xH_yO_z$  on  $Pd_{10}Cu_5$  with respect to previous theoretical studies.

| Adsorbate          | $Pd_{10}Cu_5$<br>PBE | $Pd-PdCu(111)^1$<br>PBE | $Cu-PdCu(111)^1$<br>PBE | $Pd_6Cu_3(111)^2$<br>PW91 |
|--------------------|----------------------|-------------------------|-------------------------|---------------------------|
| CO <sub>2</sub>    | -0.60                | -0.42                   | -0.20                   | -0.17                     |
| COOH               | -2.69                | -3.08                   | -2.47                   | -2.03                     |
| CO                 | -1.85                | -1.96                   | -1.84                   | -1.33                     |
| CH <sub>3</sub> OH | -0.61                |                         |                         | -0.40                     |
| CH <sub>2</sub> OH | -2.07                |                         |                         | -1.96                     |
| CH <sub>2</sub> O  | -0.82                |                         |                         | -0.30                     |
| CHO                | -2.60                |                         |                         | -2.50                     |

1. J. Mater. Chem. A, 2016, 4, 4776–4782.

2. J. Phys. Chem. C 2017, 121, 26287–26299.
